# Supplementary material for: Using machine learning models to predict the initiation of renal replacement therapy among chronic kidney disease patients
Source: PubMed Central journal article supplement (PMC7274378; doi:10.1371/journal.pone.0233976), 2020-06-05
Supplement: pone.0233976.s001.pdf [file pone.0233976.s001.pdf]

# Using machine learning models to predict the initiation of renal replacement therapy among chronic kidney disease patients

Erik Dovgan<sup>1\*</sup>, Anton Gradišek<sup>1</sup>, Mitja Luštrek<sup>1</sup>, Mohy Uddin<sup>2</sup>, Aldilas Achmad Nursetyo<sup>3</sup>, Sashi Kiran Annavarajula<sup>4</sup>, Yu-Chuan Li<sup>3</sup>, Shabbir Syed-Abdul<sup>3\*</sup>

**1** Jožef Stefan Institute, Department of Intelligent Systems, Jamova cesta 39, SI-1000 Ljubljana, Slovenia

**2** Executive Office, King Abdullah International Medical Research Center, King Saud bin Abdulaziz University for Health Sciences, Ministry of National Guard – Health Affairs, Riyadh, Kingdom of Saudi Arabia

**3** Taipei Medical University, Graduate Institute of Biomedical Informatics, College of Medical Science and Technology, Taipei, Taiwan

**4** Yashoda Hospitals, Department of Nephrology, Malakpet, Hyderabad, India

\* erik.dovgan@ijs.si, drshabbir@tmu.edu.tw

## Supporting information

The tables in this section show:

- Table S1-Table S5: Statistics of AUC for each feature selection approach, data preprocessing and ML algorithm independently when predicting twelve months ahead.
- Table S6-Table S7: Top 10 algorithms in combination with data processing, when predicting six- and three- months ahead respectively.
- Table S8-Table S9: Confusion matrices for six- and three- months-ahead prediction using Logistic Regression.
- Table S10-Table S12: Confusion matrices for models that are built and tested on data of all patients or of patients with diabetes only.
- Table S13: Statistics on the comorbidities in the dataset, including RRT and hazard ratio (HR) for each prediction period.

**Table S1. AUCs of approaches for obtaining features.**

|            | Mean  | Std   | Min   | 25 %  | 50 %  | 75 %  | Max          |
|------------|-------|-------|-------|-------|-------|-------|--------------|
| Raw        | 0.676 | 0.066 | 0.561 | 0.625 | 0.694 | 0.705 | 0.765        |
| Percentage | 0.642 | 0.137 | 0.321 | 0.575 | 0.686 | 0.746 | 0.769        |
| Boolean    | 0.685 | 0.074 | 0.561 | 0.631 | 0.702 | 0.746 | 0.767        |
| Time       | 0.665 | 0.097 | 0.497 | 0.595 | 0.693 | 0.752 | <b>0.773</b> |

**Table S2. AUCs of feature selection approaches.**

|               | Mean  | Std   | Min   | 25 %  | 50 %  | 75 %  | Max          |
|---------------|-------|-------|-------|-------|-------|-------|--------------|
| None          | 0.676 | 0.066 | 0.561 | 0.625 | 0.694 | 0.705 | <b>0.765</b> |
| Correlations  | 0.573 | 0.014 | 0.549 | 0.560 | 0.576 | 0.586 | 0.587        |
| Comorbidities | 0.568 | 0.056 | 0.498 | 0.527 | 0.557 | 0.619 | 0.657        |
| SHL           | 0.552 | 0.023 | 0.509 | 0.535 | 0.563 | 0.568 | 0.569        |

**Table S3. AUCs of filtering approaches.**

|          | Mean  | Std   | Min   | 25 %  | 50 %  | 75 %  | Max          |
|----------|-------|-------|-------|-------|-------|-------|--------------|
| None     | 0.676 | 0.066 | 0.561 | 0.625 | 0.694 | 0.705 | <b>0.765</b> |
| Diabetes | 0.650 | 0.059 | 0.544 | 0.616 | 0.656 | 0.689 | 0.732        |

**Table S4. AUCs of dimensionality reduction approaches.**

|      | Mean  | Std   | Min   | 25 %  | 50 %  | 75 %  | Max          |
|------|-------|-------|-------|-------|-------|-------|--------------|
| None | 0.676 | 0.066 | 0.561 | 0.625 | 0.694 | 0.705 | <b>0.765</b> |
| PCA  | 0.649 | 0.057 | 0.548 | 0.626 | 0.644 | 0.681 | 0.729        |

**Table S5. AUCs of ML algorithms.**

|                       | Mean  | Std   | Min   | 25 %  | 50 %  | 75 %  | Max          |
|-----------------------|-------|-------|-------|-------|-------|-------|--------------|
| Decision tree         | 0.577 | 0.037 | 0.512 | 0.549 | 0.580 | 0.602 | 0.660        |
| Bagging Decision Tree | 0.629 | 0.065 | 0.526 | 0.560 | 0.641 | 0.690 | 0.707        |
| Random Forest         | 0.620 | 0.056 | 0.527 | 0.561 | 0.627 | 0.670 | 0.697        |
| XGBoost               | 0.691 | 0.060 | 0.568 | 0.654 | 0.698 | 0.736 | 0.767        |
| SVM                   | 0.613 | 0.135 | 0.269 | 0.594 | 0.635 | 0.691 | 0.762        |
| SGD                   | 0.673 | 0.064 | 0.527 | 0.643 | 0.671 | 0.731 | 0.768        |
| Nearest Neighbors     | 0.582 | 0.029 | 0.512 | 0.566 | 0.581 | 0.602 | 0.632        |
| Naive Bayes           | 0.574 | 0.070 | 0.498 | 0.511 | 0.554 | 0.651 | 0.696        |
| Logistic Regression   | 0.687 | 0.059 | 0.569 | 0.649 | 0.675 | 0.739 | <b>0.773</b> |
| Neural Network        | 0.639 | 0.053 | 0.538 | 0.596 | 0.662 | 0.672 | 0.706        |

**Table S6. Top 10 algorithms in combination with data processing, when predicting six months ahead. Results are sorted with respect to AUC.**

| Model               | Features   | Balance | AUC   | Sensitivity | Specificity |
|---------------------|------------|---------|-------|-------------|-------------|
| Logistic Regression | time       | no      | 0.791 | 0.059       | 0.995       |
| SGD Classifier      | time       | no      | 0.790 | 0.055       | 0.995       |
| XGBoost             | raw        | no      | 0.785 | 0.021       | 0.999       |
| XGBoost             | boolean    | no      | 0.782 | 0.018       | 0.999       |
| XGBoost             | percentage | no      | 0.781 | 0.016       | 0.999       |
| SGD Classifier      | time       | yes     | 0.780 | 0.630       | 0.794       |
| XGBoost             | time       | no      | 0.778 | 0.017       | 0.999       |
| Logistic Regression | time       | yes     | 0.778 | 0.568       | 0.832       |
| XGBoost             | raw        | yes     | 0.778 | 0.562       | 0.834       |
| Logistic Regression | percentage | no      | 0.777 | 0.020       | 0.998       |

**Table S7. Top 10 algorithms in combination with data processing, when predicting three months ahead. Results are sorted with respect to AUC.**

| Model               | Features   | Balance | AUC   | Sensitivity | Specificity |
|---------------------|------------|---------|-------|-------------|-------------|
| SGD                 | time       | no      | 0.801 | 0.017       | 0.999       |
| Logistic Regression | time       | no      | 0.798 | 0.031       | 0.998       |
| XGBoost             | time       | no      | 0.793 | 0.008       | 1.000       |
| XGBoost             | raw        | no      | 0.792 | 0.008       | 0.999       |
| XGBoost             | boolean    | no      | 0.789 | 0.012       | 1.000       |
| XGBoost             | percentage | no      | 0.788 | 0.004       | 1.000       |
| Logistic Regression | percentage | no      | 0.784 | 0.002       | 0.999       |
| SGD                 | percentage | no      | 0.784 | 0.002       | 0.999       |
| XGBoost             | boolean    | yes     | 0.782 | 0.548       | 0.847       |
| SGD                 | percentage | yes     | 0.781 | 0.514       | 0.838       |

**Table S8. Confusion matrix for six-months-ahead prediction.**

|      |     | Predicted |      |
|------|-----|-----------|------|
|      |     | No        | Yes  |
| True | No  | 10351     | 2087 |
|      | Yes | 328       | 432  |

**Table S9. Confusion matrix for three-months-ahead prediction.**

|      |     | Predicted |      |
|------|-----|-----------|------|
|      |     | No        | Yes  |
| True | No  | 13639     | 2170 |
|      | Yes | 256       | 260  |

**Table S10. Confusion matrix for the model that was built on data of all patients and tested on data of all patients.**

|      |     | Predicted |      |
|------|-----|-----------|------|
|      |     | No        | Yes  |
| True | No  | 5819      | 1628 |
|      | Yes | 394       | 651  |

**Table S11. Confusion matrix for the model that was built on data of patients with diabetes and tested on data of patients with diabetes.**

|      |     | Predicted |     |
|------|-----|-----------|-----|
|      |     | No        | Yes |
| True | No  | 2028      | 570 |
|      | Yes | 225       | 281 |

**Table S12. Confusion matrix for the model that was built on data of all patients and tested on data of patients with diabetes.**

|      |     | Predicted |     |
|------|-----|-----------|-----|
|      |     | No        | Yes |
| True | No  | 1789      | 809 |
|      | Yes | 154       | 352 |

**Table S13. Statistics on the comorbidities in the dataset, including RRT and hazard ratio (HR) for each prediction period.**

| Comorbidity                                   | No. cases  | One year   |           |             |            | Six months |            |             |           | Three months |    |             |    |
|-----------------------------------------------|------------|------------|-----------|-------------|------------|------------|------------|-------------|-----------|--------------|----|-------------|----|
|                                               |            | With RRT   |           | Without RRT |            | With RRT   |            | Without RRT |           | With RRT     |    | Without RRT |    |
|                                               |            | No. cases  | HR        | No. cases   | HR         | No. cases  | HR         | No. cases   | HR        | No. cases    | HR | No. cases   | HR |
| All patients                                  | 19954      | 8492       | 1045      | 7447        | 13198      | 760        | 12438      | 16325       | 516       | 15809        |    |             |    |
| Diabetes                                      | 6506 (33%) | 3123 (37%) | 508 (49%) | 2615 (35%)  | 4545 (34%) | 357 (47%)  | 4188 (34%) | 5479 (34%)  | 231 (45%) | 5248 (33%)   |    |             |    |
| Diabetic Type I                               | 198 (1%)   | 108 (1%)   | 27 (3%)   | 81 (1%)     | 149 (1%)   | 22 (3%)    | 127 (1%)   | 173 (1%)    | 12 (2%)   | 161 (1%)     |    |             |    |
| Diabetic Type II                              | 5928 (30%) | 2863 (34%) | 480 (46%) | 2383 (32%)  | 4132 (31%) | 338 (44%)  | 3794 (31%) | 5001 (31%)  | 222 (43%) | 4779 (30%)   |    |             |    |
| Diabetic Type II unspecified                  | 6468 (32%) | 3104 (37%) | 506 (48%) | 2598 (35%)  | 4515 (34%) | 356 (47%)  | 4159 (33%) | 5446 (33%)  | 230 (45%) | 5216 (33%)   |    |             |    |
| Essential hypertension                        | 9052 (45%) | 4622 (54%) | 633 (61%) | 3989 (54%)  | 6370 (48%) | 452 (59%)  | 5918 (48%) | 7640 (47%)  | 300 (58%) | 7340 (46%)   |    |             |    |
| Hypertensive heart disease                    | 3938 (20%) | 2124 (25%) | 271 (26%) | 1853 (25%)  | 2844 (22%) | 195 (26%)  | 2649 (21%) | 3350 (21%)  | 128 (25%) | 3222 (20%)   |    |             |    |
| Hypertensive chronic kidney disease           | 250 (1%)   | 139 (2%)   | 27 (3%)   | 112 (2%)    | 181 (1%)   | 18 (2%)    | 163 (1%)   | 211 (1%)    | 10 (2%)   | 201 (1%)     |    |             |    |
| Hypertensive heart and chronic kidney disease | 175 (1%)   | 112 (1%)   | 17 (2%)   | 95 (1%)     | 136 (1%)   | 13 (2%)    | 123 (1%)   | 155 (1%)    | 12 (2%)   | 143 (1%)     |    |             |    |
| Secondary hypertension                        | 159 (1%)   | 101 (1%)   | 23 (2%)   | 78 (1%)     | 120 (1%)   | 16 (2%)    | 104 (1%)   | 138 (1%)    | 12 (2%)   | 126 (1%)     |    |             |    |
| Acute glomerulonephritis                      | 110 (1%)   | 61 (1%)    | 16 (2%)   | 45 (1%)     | 81 (1%)    | 10 (1%)    | 71 (1%)    | 95 (1%)     | 9 (2%)    | 86 (1%)      |    |             |    |
| Chronic glomerulonephritis                    | 1727 (9%)  | 1120 (13%) | 232 (22%) | 888 (12%)   | 1351 (10%) | 177 (23%)  | 1174 (9%)  | 1522 (9%)   | 118 (23%) | 1404 (9%)    |    |             |    |
| Acute and chronic glomerulonephritis          | 1811 (9%)  | 1159 (14%) | 241 (23%) | 918 (12%)   | 1408 (11%) | 182 (24%)  | 1226 (10%) | 1591 (10%)  | 123 (24%) | 1468 (9%)    |    |             |    |
| Polycystic kidney                             | 65 (0%)    | 43 (1%)    | 12 (1%)   | 31 (0%)     | 51 (0%)    | 7 (1%)     | 44 (0%)    | 59 (0%)     | 3 (1%)    | 56 (0%)      |    |             |    |
| Nephritis NEC                                 | 16 (0%)    | 11 (0%)    | 4 (0%)    | 7 (0%)      | 15 (0%)    | 2 (0%)     | 13 (0%)    | 16 (0%)     | 2 (0%)    | 14 (0%)      |    |             |    |
| Calculus of kidney and ureter                 | 1228 (6%)  | 486 (6%)   | 32 (3%)   | 454 (6%)    | 726 (6%)   | 26 (3%)    | 700 (6%)   | 951 (6%)    | 12 (2%)   | 939 (6%)     |    |             |    |
| Calculus of lower urinary tract               | 70 (0%)    | 23 (0%)    | 0 (0%)    | 23 (0%)     | 34 (0%)    | 0 (0%)     | 34 (0%)    | 51 (0%)     | 0 (0%)    | 51 (0%)      |    |             |    |
| Urinary obstruction                           | 19 (0%)    | 8 (0%)     | 1 (0%)    | 7 (0%)      | 13 (0%)    | 1 (0%)     | 12 (0%)    | 14 (0%)     | 0 (0%)    | 14 (0%)      |    |             |    |
| Vesicoureteral reflux                         | 5 (0%)     | 1 (0%)     | 0 (0%)    | 1 (0%)      | 2 (0%)     | 0 (0%)     | 2 (0%)     | 2 (0%)      | 0 (0%)    | 2 (0%)       |    |             |    |
| Infections of kidney                          | 455 (2%)   | 209 (2%)   | 27 (3%)   | 182 (2%)    | 284 (2%)   | 23 (3%)    | 261 (2%)   | 362 (2%)    | 16 (3%)   | 346 (2%)     |    |             |    |
